# 1                    **Mathematical Modeling of COVID-19 Pandemic in the African Continent**

2                                            Nawel ARIES<sup>1\*</sup> and Houdayfa OUNIS<sup>1,2</sup>

3                    <sup>1</sup>Centre de Développement des Energies Renouvelables, CDER, 16340, Algiers, Algeria

4                    <sup>2</sup>Institut de Recherche Dupuy de Lôme, CNRS UMR 6027, IRDL, Lorient F-56100, France,  
5                                            email :houdayfa.ounis@gmail.com

6  
7                    Centre de Développement des Energies Renouvelables, CDER, 16340, Algiers, Algeria

## 8 9                    **Abstract:**

10                    The present work aims to give a contribution to the understanding of the highly infectious  
11                    pandemic caused by the COVID-19 in the African continent. The study focuses on the  
12                    modelling and the forecasting of COVID-19 spread in the most affected African continent,  
13                    namely: Morocco, Algeria, Tunisia, Egypt and South Africa and for the sake of comparison  
14                    two of the most affected European country are also considered, namely: France and Italy. To  
15                    this end, an epidemiological SEIQRDP model is presented, which is an adaptation of the classic  
16                    SIR model widely used in mathematical epidemiology. In order to better coincide with the  
17                    preventive measures taken by the governments to deal with the spread of COVID-19, this  
18                    model considers the quarantine. For the identification of the model's parameters, official data  
19                    of the pandemic up to August 1<sup>st</sup>, 2020 are considered. The results show that the number of  
20                    infections due to the use of quarantine is expected to be very low provided the isolation is  
21                    effective. However, it is increasing in some countries with the early lifting of containment.  
22                    Finally, the information provided by the SEIQRDP model could help to establish a realistic  
23                    assessment of the short-term pandemic situation. Moreover, this will help maintain the most  
24                    appropriate and necessary public health measures after the lockdown lifting.

25  
26                    **Keywords:** COVID-19; SEIQRDP model; reproduction number; African continent.

27  

---

\* Corresponding author at: Centre de Développement des Energies Renouvelables, CDER, BP. 62 Route de  
1<sup>Observatoire Bouzareah, 16340 Algiers, Algeria</sup>  
.E-mail: n.aries@cder.dz (N. Aries).

## 28        **1. Introduction**

29        The year 2020 is and will be forever marked by the COVID-19 pandemic caused by the highly  
30        infectious disease SARS-CoV-2. According to the World Health Organization, since its first  
31        appearance in late 2019 in the Wuhan region of China, the Covid-19 has affected more than 6  
32        million people and has caused the death of almost 400 thousand people worldwide, during the  
33        first half of 2020. However, the spread of the disease and the damage caused by it did not  
34        happen in the same way and at the same time for all continents. Indeed, taking the case of the  
35        African continent, the COVID-19 pandemic reached a significant point by exceeding 180,000  
36        cases in early June with more than 5,000 deaths. Although the pandemic has reached a  
37        worrying threshold, the spread of the disease in Africa has not followed the exponential path as  
38        in the rest of the world (e.g. Europe and United States). According to WHO's analysis, the  
39        relatively low mortality rate compared to other continents is likely due to the demographic  
40        nature of the continent. Indeed, demographically, Africa is considered as the youngest  
41        continent, with more than 60% of the population under the age of 25. However, the disease still  
42        represents a danger for the African population, particularly, the South and African North. In  
43        fact, according to the WHO, the above-mentioned regions account for more than 56% of the  
44        cases recorded in Africa.

45        To date, in the absence of an effective vaccine or treatment against COVID-19, African  
46        governments have taken several measures to limit the spread of the disease as much as possible  
47        (e.g. quarantine, social distancing, lockdown, curfew, masks, etc.). Furthermore, during this  
48        anti-COVID-19 battle, in addition to medical and biological research, theoretical studies based  
49        on mathematical models can also play an important role in understanding the pandemic  
50        dynamics (e.g. predicting the inflection point and of the end time). These models are therefore  
51        an important decision-making tool for coping with this pandemic. Since the apparition of the  
52        disease, the literature has witnessed an avalanche of work on modelling and predicting the  
53        behaviour of the COVID-19 pandemic. However, most of these works have focused on China  
54        [1-5], Europe [6-11] and the United States [7, 11-13], which is understandable because these  
55        are the regions which were the first and most affected by COVID-19. Nevertheless, studies on  
56        the African continent are practically negligible compared to those dedicated to the above-  
57        mentioned regions [14-16].

58        The present paper aims to present a contribution on the modelling and the forecasting of  
59        COVID-19 spread in the most affected African continent, namely: Morocco, Algeria, Tunisia,  
60        Egypt and South Africa. In addition, for the sake of comparison two European countries are  
61        considered, namely: France and Italy. Thereby, an epidemic SEIQRDP model is presented,  
62        which is an adaptation of the classic SIR model widely used in mathematical epidemiology. In  
63        the next section, we present the data and the model. Section 3 presents the results of the  
64        application of the model for the above-mentioned countries through the estimation of the  
65        epidemic parameters and the adjustment of the model. The discussion of the results obtained as  
66        well as a forecast analysis, are presented in the same section. The last section provides some  
67        future directions for using the SEIQRDP model to control and prevent the spread of the  
68        COVID-19virus.

69

70

## 71 2. Data and Model

### 72 2.1. Data

73 The epidemiologic data of Covid-19 were provided by the Johns Hopkins University Center for  
74 Systems Science and Engineering (JHUCSSE) [17], and derived from the official case count  
75 from the World Health Organization. The data provides the total number of confirmed,  
76 quarantined, recovered and death cases, for each country since January 22, the day that WHO  
77 announced an epidemic caused by a new coronavirus in China. Our preliminary study includes  
78 the most affected African countries and one of the main endemic foci in Europe, namely:  
79 Algeria, Morocco, Egypt, South Africa, Tunisia, France, and Italy. Figure 1 shows the  
80 cumulative reported cases of COVID-19 in the considered countries. The data refer to daily  
81 cumulative cases from January 22, 2020 until August 1st, 2020. It is important to note that  
82 these data are influenced by the capacity and strategy of countries in case detection. Some  
83 countries perform more tests than others. However, the provided data still provide indicator for  
84 tracking the trajectories of the epidemic. It can be well seen from figure 1 that the curve of  
85 newly detected cases in European countries is gradually flattening. On the other hand, there is  
86 an epidemic surge in the African countries, where the number of cumulative cases shows a  
87 different picture. Indeed, South Africa and Egypt are currently the countries with most known  
88 confirmed and deaths cases and the curve of infections still pointing mostly upwards.

89 Unlike the last ones, the curve of cumulative cases is increasing less rapidly in Algeria and  
90 Morocco. Although Algeria has the highest number of deaths ahead the African countries.  
91 While, the curve of newly detected cases in Tunisia quickly flattened. Infection numbers have,  
92 however, also shown some signs of slowing down. It should be noted that the African continent  
93 is the last to be affected by the coronavirus. Indeed,

94 The epidemic spread to Africa a few weeks after Europe, allowing its leaders to adopt  
95 preventive measures well in advance. South Africa, Tunisia, Morocco and Algeria imposed the  
96 lockdown and curfews before the epidemic had had time to spread. In addition, the low  
97 population density has considerably limited the transmission of the virus. Indeed, the  
98 inhabitants are generally concentrated in the capitals.

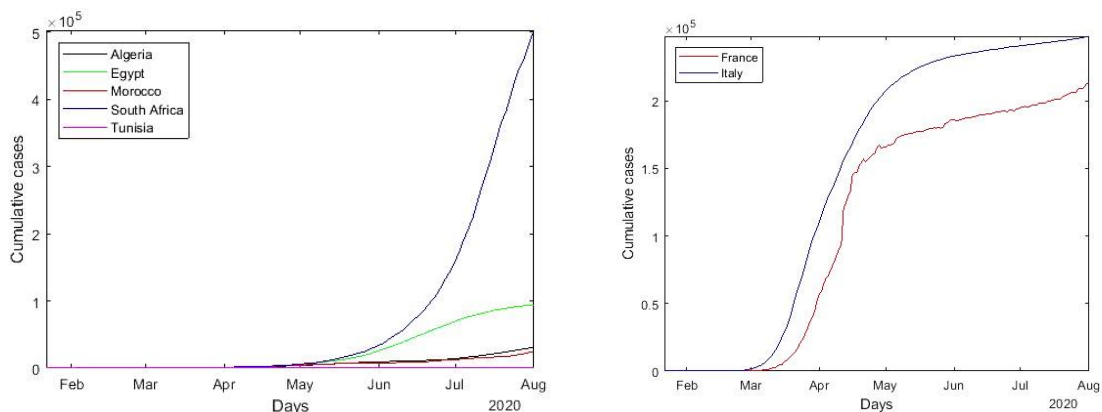

99

100

**Figure 1** Cumulative reported cases of COVID-19 disease.

101

102

103 **2.2. SEIQRDP Model**

104 Using a pandemic modeling makes it possible to understand, describe and forecast its behavior  
 105 and its spread. Indeed, the mathematical models assess hypotheses, indicate trends, and help  
 106 develop public health responses by estimating risks, in real time, during an epidemic.  
 107 Nevertheless, modeling is a simplified representation of reality. Its precision is limited here by  
 108 the ignorance of certain factors and mechanism of propagation of COVID-19.

109 In this work, the SEIQRDP epidemiological model with seven different components, proposed  
 110 by [2] is used. The model is an adaptation of the classic SEIR model [18, 19], widely used to  
 111 study the COVID-19 pandemic in many countries with variations in components and  
 112 parameters for adaptations to regions and study period [16, 19-23]. The present model  
 113 considers the effect of quarantine adopted by many countries as an effective means of  
 114 preventing the spread. The stochastic SEIQRDP model is specified by the following system of  
 115 differential equations:

$$\left\{ \begin{array}{l} \frac{dS_t}{dt} = -\beta \frac{S_t I_t}{N} \\ \frac{dP_t}{dt} = \alpha S_t \\ \frac{dE_t}{dt} = \beta \frac{S_t I_t}{N} - \gamma E_t \\ \frac{dI_t}{dt} = \gamma E_t - \delta I_t \\ \frac{dQ_t}{dt} = \delta I_t - \lambda_t Q_t - \kappa_t Q_t \\ \frac{dR_t}{dt} = \lambda_t Q_t \\ \frac{dD_t}{dt} = \kappa_t Q_t \end{array} \right. \quad (1)$$

117 Where the different component at time  $t$ , i.e,  $S_t, P_t, E_t, I_t, Q_t, R_t, D_t$  are respectively, the number  
 118 of susceptible cases (individuals who can contract the disease), the number of protected cases,  
 119 who have become insensitive to the disease, mainly by following the recommended protective  
 120 measures, the number of exposed case (individuals that have contracted the disease but not yet  
 121 infectious), the number of infectious cases (infectious individuals but not yet quarantined), the  
 122 number of quarantined cases, i.e active cases (confirmed and infected), the recovered and death  
 123 cases (individuals removed from the chain of transmission), respectively. The component of  
 124 protected part of people, namely,  $P_t$ , was introduced to reflect the growing awareness of the  
 125 population while respecting the lockdown. It should be noted that the total population  $N$  is  
 126 assumed to be homogenous, i.e. there is no birth or death and recovered people remain immune  
 127 once they recover from the disease where,  $N = S_t + P_t + E_t + I_t + Q_t + R_t + D_t$ .

128 The protection rate  $\alpha$ , represents the population that takes into consideration security measures  
 129 and the actions of health authorities, it was introduced assuming that the sensitive population  
 130 decreases steadily. Moreover, beside the parameter  $\alpha$ , all the remaining parameters depend on

131 the evolution of the epidemic, the health care and the screening capacities and are calculated  
132 based on the daily numbers of confirmed, recovery and death cases. The infection rate  $\beta$ ,  
133 represent the average number of contacts per-capita per time, multiplied by the probability of  
134 successfully getting infected when coming into contact with an infected individual. While, the  
135 latent rate  $\gamma^{-1}$ , represent the average time for a latent individual to become infectious, which is  
136 estimated within several days [4, 24]. Furthermore, the quarantined rate  $\delta^{-1}$  represent the  
137 average time for an infectious individual to enter in quarantine, which is considered to be  
138 between 2 and 14 days [2]. Finally, to consider the measures taken by the different countries in  
139 this study, we assume that the recovery rate  $\lambda_t$  and the death rate  $\kappa_t$  are time dependent  
140 function, as confirmed by [2, 21].

141 In case of a new disease as the COVID-19, the medical staff must learn new therapeutic  
142 procedures and treat patients with new symptoms every day. Hence, the time of recovery,  
143 cannot be a constant, because the recovery time at the start of the disease is longer, this means a  
144 slower recovery rate which gradually increasing with time, considering the measures taken by  
145 the governments. Consequently, we will assume that the recovery rate is modeled by following  
146 function,

$$147 \quad \lambda_t = \lambda_0 [1 - \exp(-\lambda_1 t)], \quad (2)$$

148 where  $\lambda_0$  and  $\lambda_1$  are the fitted coefficients [2].

149 Unlike the recovery rate, the mortality rate quickly decreases over time. This is due to the  
150 medical assistance, the adaptation of the pathogen and the development of new treatments.  
151 Hence, we will assume that the mortality rate is modeled by an exponential decay function  
152 given as follows,

$$153 \quad \kappa_t = \kappa_0 \exp(-\kappa_1 t), \quad (3)$$

154 where  $\kappa_0$  and  $\kappa_1$  are the fitted coefficients [2].

155 However, one of the most discussed parameters in the current COVID-19 pandemic is the basic  
156 reproductive number [2, 24-26]. Biologically, this number, represented by  $R_0$ , corresponds to  
157 the number of new infections caused by an infected individual in a susceptible population. One  
158 of the main reasons of the importance of the basic reproduction number is that it determines the  
159 fraction of the population that needs to be immunized for the epidemic to start to decline. The  
160 reproductive number will vary during an epidemic for two reasons. On the one hand, the public  
161 health measures are put in place, like the lockdowns, social distancing, and other mitigation  
162 strategies to keep the case count and death toll low in this pandemic. On the other hand, the  
163 epidemic spreads and people who have recovered are protected against reinfection (at least in  
164 the near future). Thus, the population becomes immune.

165 If the  $R_0$  is above 1, each infection breeds more, and the outbreak will continue to grow. When  
166 it falls below 1, the outbreak will continue but at a lower death rate.

167 In this study, the  $R_0$  is calculated by the next generation matrix method [22], based on a  
 168 endemic equilibrium, given by :  $S = N, P = E = I = Q = R = D = 0$ . We must solve the  
 169 equation,  $R_0 = \rho(FV^{-1})$ , where  $F$  and  $V$  are, respectively, the derivatives of the new  
 170 infections matrix  $\mathcal{F}$  and the transition matrix  $\mathcal{V}$ , evaluated at the endemic equilibrium and is  
 171 given by,  $R_t = \beta * \delta^{-1}(1 - \alpha)^t$ , where  $t$  represent the number of days.

172 The nonlinear system of the SEIQRDP model given by (1.1) can only be solved using  
 173 numerical methods to observe the dynamics of the model. Firstly, we estimated the parameters,  
 174 namely,  $\alpha, \beta, \gamma^{-1}, \delta^{-1}, \lambda_t, \kappa_t$ . In this step, we search the unknown parameters for the SEIQRDP  
 175 model by global optimization. This is done automatically by implementing the nonlinear least  
 176 square regression method. The optimization of the model parameters to describe the  
 177 experimental results was performed via the minimization of the sum of the squared errors  
 178 between the epidemiologic and the modeling data, during successive iterations, which finally  
 179 gives the best parameters for data fitting. It should be noted that the use of the cumulative data  
 180 should be avoided, since the cumulative incidence data are highly correlated, and the least  
 181 squares approaches relies on the fitting of independent data. Therefore, the use of daily new  
 182 data should be preferred, since these data are independent. Once all the parameters are known,  
 183 we can solve the system of differential equations (1.1).

### 184 3. Results and Discussion

185 The estimated parameters for the considered countries are given in Table 1, where we consider  
 186 the mean values of the recovery rate and deaths rate,  $\lambda_t$  and  $\kappa_t$ , respectively .

187 **Table 1.** Parameter estimation of the SEIQRDP model

| Country      | N        | $\alpha$ | $\beta$ | $\gamma$ | $\delta$ | $\lambda_t$ | $\kappa_t$ |
|--------------|----------|----------|---------|----------|----------|-------------|------------|
| Morocco      | 36e+6    | 0.017    | 0.524   | 0.475    | 0.175    | 0.057       | 0.003      |
| Algeria      | 43e+6    | 0.017    | 0.448   | 0.332    | 0.136    | 0.051       | 0.008      |
| Tunisia      | 12e+6    | 0.055    | 0.675   | 0.407    | 0.139    | 0.038       | 0.001      |
| Egypt        | 100e+6   | 0.032    | 0.379   | 0.0.249  | 0.0.479  | 0.003       | 0.007      |
| South Africa | 56e+6    | 0.008    | 0.424   | 0.461    | 0.169    | 0.049       | 0.002      |
| France       | 65e+6    | 0.022    | 0.799   | 0.349    | 0.173    | 0.015       | 0.009      |
| Italy        | 60.48e+6 | 0.028    | 0.954   | 0.347    | 0.174    | 0.028       | 0.006      |

188  
 189 The estimated parameter values are strongly linked to the discipline of the local population,  
 190 public health systems and the severity of the lockdown measures. Although there is so far no  
 191 gold standard for assessing the accuracy of the model parameters, the values of the obtained  
 192 parameters are in good agreement with the estimates given by [4, 27, 28]. The protection rate is  
 193 expected to remain very close to zero since there is currently no vaccine against COVID-19  
 194 [20] . It can be seen from table 1 that Tunisia shows the highest protection rates, which reflects  
 195 the increase of people infected with the new coronavirus after the opening of the country's  
 196 borders. The infection rate  $\beta$  values are in the range of the recent estimate by [4]. The lower it

197 is, the less an infected individual will be able to infect healthy individuals. However, Tunisia  
198 shows a high infectious potential of the disease, compared to other African countries, which  
199 confirms the result of the protection rate. The obtained latent rates (Table 1) are, also, in  
200 agreement with the existing report [24], where Egypt has the longest latency period, which  
201 explains the number of infected people exceeding 94,000 cases. This may be due the delay in  
202 taking control and prevention measures against COVID-19. Notes that the latent period for  
203 COVID-19 is limited to  $\gamma \in [0.2:0.5]$ , so a latency period between 2 and 5 days [24]. While,  
204 Diekmann, Heesterbeek [22] notes that the average incubation period  $\gamma^{-1} + \delta^{-1}$  for COVID-19  
205 is between 2.1 and 11.1 days, this implies an infection rate limited to  $\delta \in [0.1:1]$ . Therefore, a  
206 quarantine period between 1 and 10 days. The estimation values obtained are within this  
207 estimation range, where the smallest quarantine period is recorded in Egypt. However, the  
208 parameters  $\lambda_i$  and  $\kappa_i$  governing, respectively, the recovery rate and the mortality rate of the  
209 disease, seems quite similar in the different countries, except for Egypt and Algeria. It is  
210 interesting to note that the smallest value of  $\lambda_i$  is recorded in Egypt compared to other  
211 countries, which coincides with the results of the quarantine time obtained (Table 1). This is  
212 probably due to an overload of the health system which implies a shorter average quarantine  
213 period. This reflects the poor control of virus spreading by the low testing capacity and the non-  
214 compliance with health security measures against coronavirus, especially in the most affected  
215 areas of the country. On the other hand, Algeria has the highest value of the parameter  $\kappa_i$ ,  
216 probably due to prevention and control measures as well as the dramatic improvement in  
217 medical conditions, such as the use new treatment protocol as well as the strict compliance with  
218 lockdown. The use of the quarantine considered by the current SEIQRDP model is based on the  
219 separation of the healthy population from the asymptomatic population in order to prevent the  
220 spread of the virus more quickly.

221 Figure 2 shows the effective reproduction number ( $R_t$ ) as a function of time for the different  
222 modeled countries for the same period. Analyzing the effective reproduction number ( $R_t$ ) can  
223 give us more information about how the pandemic dynamics unfolded and detecting in real  
224 time the climax or turning point. Moreover, this figure is an indication of the speed and the  
225 severity of the preventive measures as well as quarantine, adopted to reduce the average  
226 infectious period by isolating certain infectious, so that they do not transmit the infection.

227

228

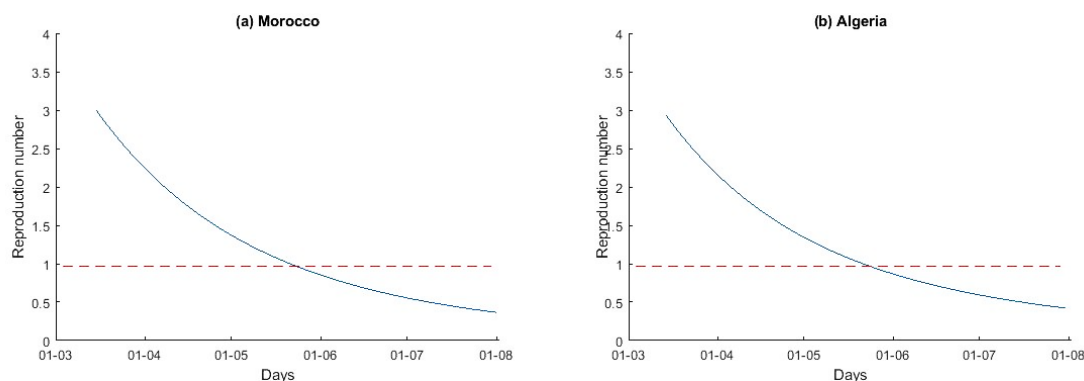

229

230

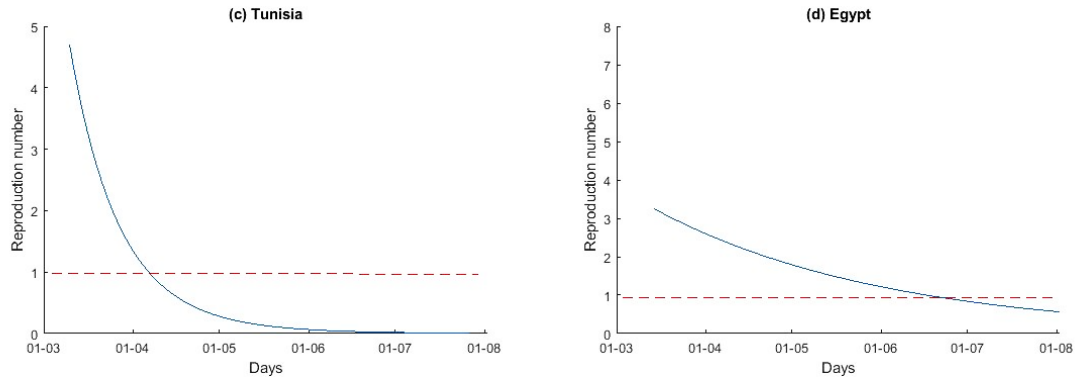

231

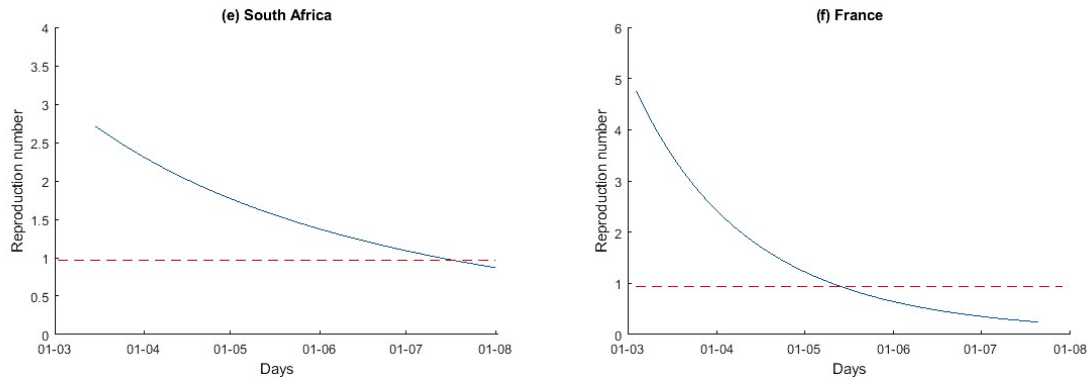

232

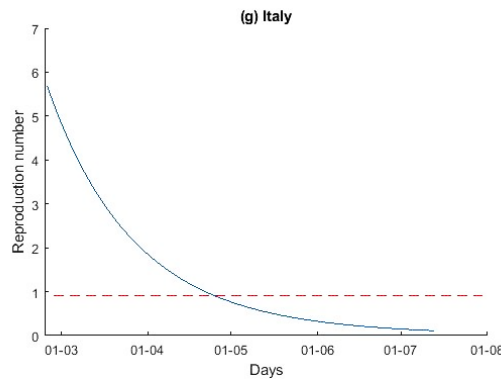

233

**Figure 2** Estimated effective reproduction number over time

234 As can be seen,  $R_t$  becomes less than 1 between early April and early June, about four to seven  
 235 weeks after the lockdown in the Maghreb countries (figure 2a-c). In fact, this shows the effects  
 236 of the lockdown, the quarantine and the strict curfews adopted to reduce the effect of virus  
 237 transmission, while for Egypt and South Africa, the  $R_t$  has not crossed the line  $R_t = 1$   
 238 (mitigation phase), till end of June for Egypt and mid-July for South Africa. However, the  
 239 lowest infection kinetics is recorded in Tunisia and has generated a first  $R_0 = 4.690$ , much  
 240 lower than those of other African countries and that of Italy especially. For Egypt, the number  
 241  $R_t$  decreased more slowly due to relative delayed lockdown compared to the other countries  
 242 and an early lifting of the lockdown. However, the number of effective reproduction number  
 243 depends on the parameter  $\delta$ , which governs the rate of transfer from the infectious class to the  
 244 quarantine class. Therefore, the use of quarantine to control the disease not only decreases the  
 245 size of the endemic infectious class, but also reduces the reproduction number  $R_t$  below 1, so  
 246 that the disease vanishes.



247 The estimation results (Table 1 and Figure 2) indicate that the measures taken to prevent, and  
248 control the epidemic taken by the governments have strengthened over time. Indeed, the  
249 admission and follow-up of suspect cases, quarantine and treatment of confirmed cases  
250 significantly affect the parameters values. As a result, the number of active (quarantined),  
251 suspect, cured cases and the deaths predicted by the SEIQRDP model tend to decrease over  
252 time. On the other hand, the accuracy of long-term forecasts will also decrease.

253 Figure 3(a-g) present the forecasts of actives (quarantined), recovery and death cases of the  
254 COVID-19 pandemic in the considered African countries and European depending on  
255 quarantine policy considered by the SEIQRDP model. While, Figure 4 presents the forecasts of  
256 the COVID-19 pandemic for France, Algeria, Morocco and Tunisia for the period after the  
257 lifting of the lockdown.

258 Figure 3 and Figure 4 show the potential of the SEIQRDP model to predict the trend of  
259 pandemic dynamics. As can be seen from Figure 3, the curves follow roughly the same trend  
260 except for the two most affected African countries, namely, Egypt and South Africa. From  
261 Figure 4, we note that the curves follow the same trend to those of Figure 3, where we notice  
262 some non-homogeneity of the data. The curves show the potential of the model to predict the  
263 trend of pandemic dynamics. Consequently, for the forecasts of the pandemic dynamics of  
264 Algeria, Morocco, Tunisia and France, we consider the results appearing in Figure 4.

265

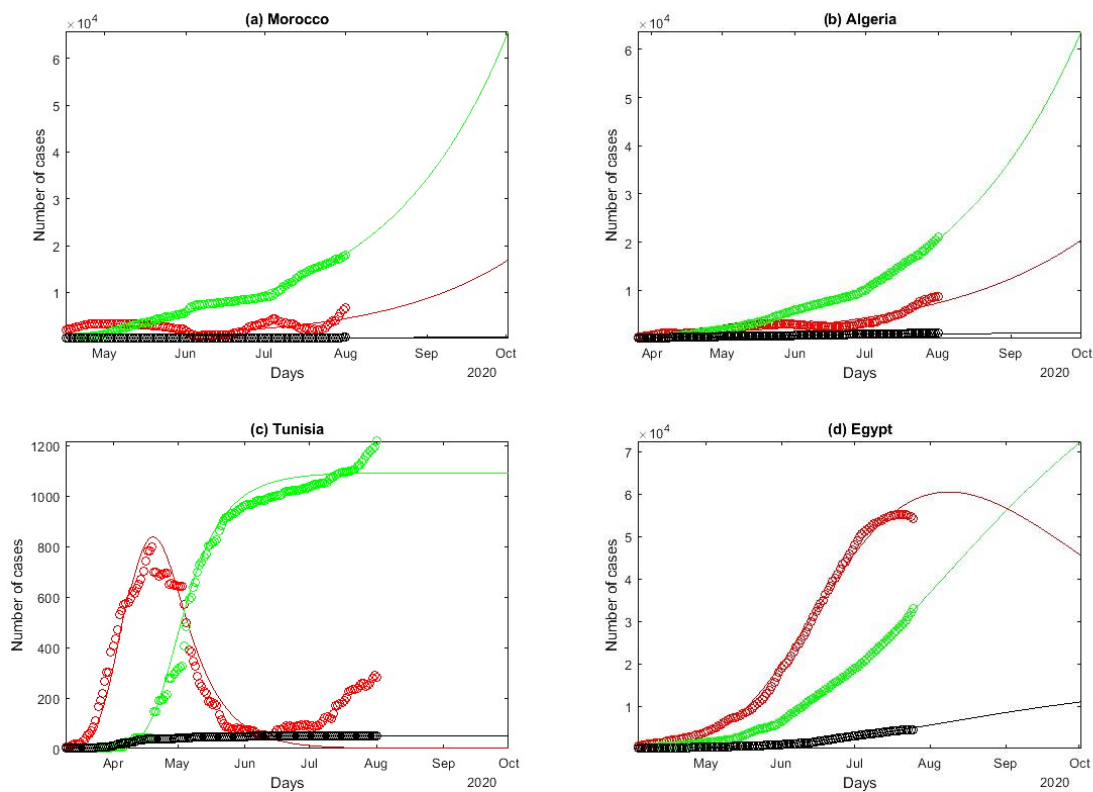

266

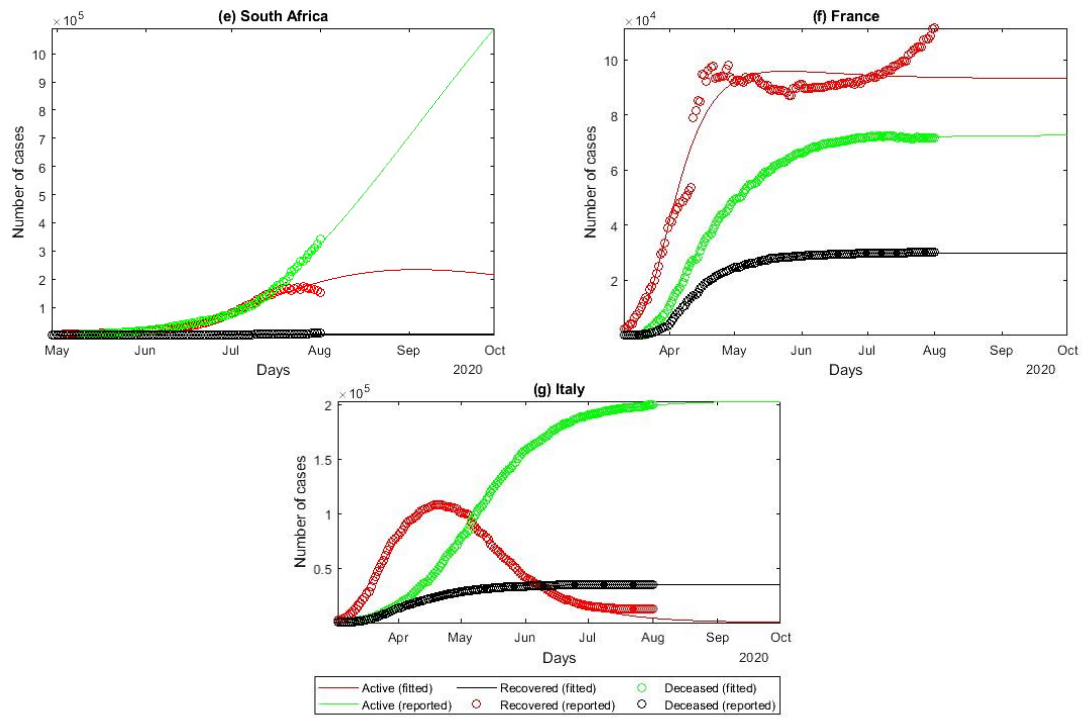

267

268

269

270

**Figure 3** COVID-19 epidemiological data reported and fitted by SEIRQDP model

271

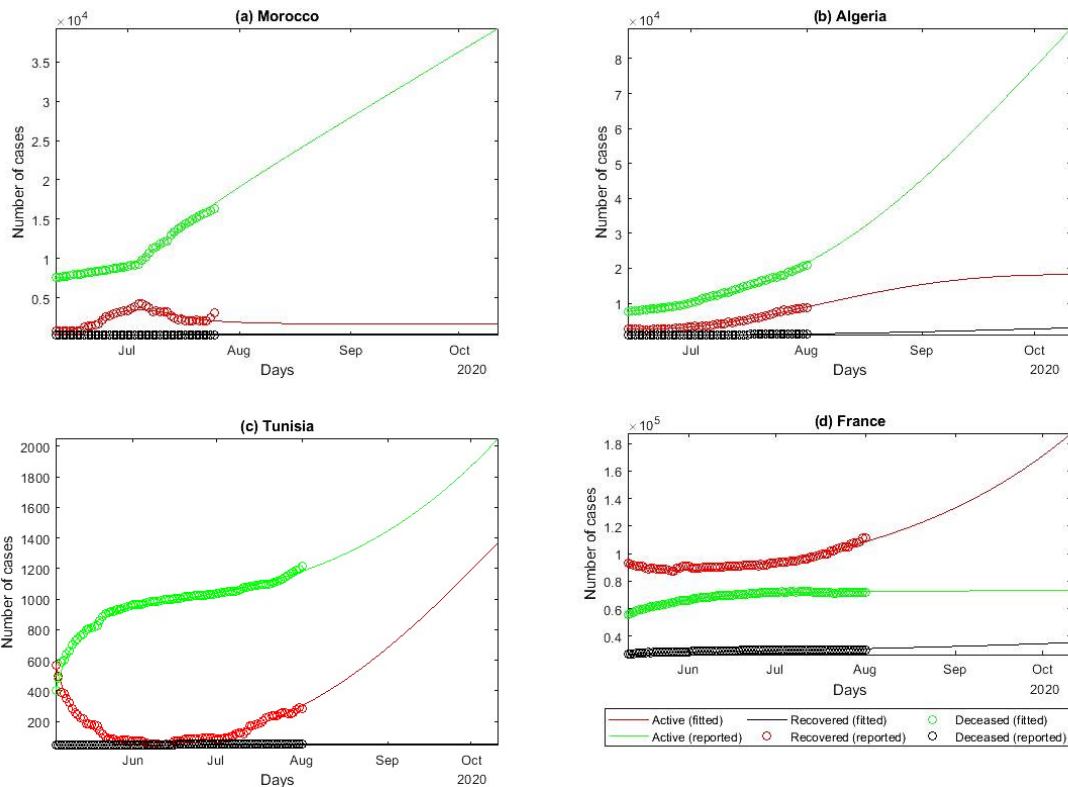

272

273

274 **Figure 4** COVID-19 epidemiologic data reported and fitted by SEIQRDP model after the lockdown lifting.

275

276 As Figure 3 shows, we find that there is a good fit between the model fitting results and the  
 277 actual COVID-19 data in each country under the optimized SEIQRDP model. Therefore, it  
 278 could be considered relatively reasonable to use the optimal model to predict the current  
 279 epidemic situation in other countries. In addition, it is estimated that countries lockdown and  
 280 closure strategies would have avoided considerable loss and millions of infections. These  
 281 results show that these measures are important and necessary to respond to this serious public  
 282 health emergency.

283 For some countries, namely, France, Algeria, Morocco and Tunisia, we notice a bad adjustment  
 284 between the results of the SEIQRDP model and the actual COVID-19 data, after the lockdown  
 285 lifting given by the following dates, 11 / 05, 14/06, 11/06, 04/05/2020, respectively. This can  
 286 be explained by the ignorance of health security measures after the lockdown lifting. In  
 287 addition, the present model, namely the SEIQRDP model, does not take into account such  
 288 shocks or changes in the situation, given the very limited testing capacity, infected people can  
 289 spread the virus if they do not comply with health security measures and they are not  
 290 quarantined, remember that this component is very important in the model, and ignorance of  
 291 the latter can affect the results of the model. Therefore, we only consider the data after the  
 292 lockdown lifting to plot the forecasts of the countries in question. Figure 4 present the forecasts  
 293 of active cases, recovery and death from the evolution of the COVID-19 pandemic by the  
 294 SEIQRDP model adapted after the lockdown lifting.

295 Based on this model, the epidemic in Italy is in its final phase and should end by September.  
296 Other countries like Morocco and Algeria are expected to get rid of COVID-19 by the end of  
297 October. States like Egypt, South Africa must wait until the end of this epidemic until  
298 November. While for Tunisia and France they experience a considerable increase in the number  
299 of infected cases and an end to the epidemic is not predictable at this time. However, these  
300 forecasts would still be accurate over a short period, given the sensitivity of the model to the  
301 value of  $\beta$ , which in turn also depends on the number of contacts per person and per unit of  
302 time. This implies that the number of cases in the future could decrease or increase  
303 considerably depending on the health security measures and the respect of these measures by  
304 the population.

305 The Maghreb has been relatively spared by the pandemic of the new coronavirus, compared to  
306 Europe, especially, the most affected (France and Italy).

307 These Maghreb countries took precautionary measures very early on with border closings,  
308 general lockdown, social distancing or the wearing of protective masks. These proactive  
309 measures, dictated by the fragility of the hospital system in each country, have so far prevented  
310 the epidemic tsunami noted in France but also in Italy, as shown in Figure 3(f-g), where the  
311 peak of infected people reached around 10E6 infected in France and Italy, compared to the  
312 epidemiological situation is generally reassuring in the Maghreb nevertheless hides trajectories  
313 which diverge appreciably, after having been similar for a long time. Indeed, with more than  
314 30.900 confirmed and 1.200 deaths cases, Algeria is the country with the most worrying  
315 situation in the Maghreb. Indeed, from Figure 3b, the number of cases confirmed daily begins  
316 to decrease after reaching its maximum. We note that there was a slight decrease in daily cases  
317 in April which seems to be explained by a low number of tests and the random rules of the  
318 lockdown. With approximately 6.500 tests performed, only cases with advanced symptoms  
319 appear to be counted. After this plateau of active cases in April, there was a worrying return  
320 until the end of May. However, according to Algerian COVID-19 forecasts by the SEIQRDP  
321 model (Figure 4b), the situation will begin to stabilize. the number of recovery cases will  
322 increase exponentially, and the number of death cases will also stabilize despite the fact that it  
323 has not grown significantly compared to the European countries. The gradually flattening in  
324 deaths is may be due to the use of the chloroquine treatment protocol [29].

325 However, Morocco will soon cross the threshold of 25.015 positive cases with more than 360  
326 deaths. After a peak around early May, a decline in late May, the resumption of daily cases in  
327 early May worried the health authorities. This can be explained by the non-compliance with the  
328 rules of social distancing rules and sanitary rules during groupings, it should be noted that most  
329 new cases were attributed to contact cases. Regarding the forecast for Morocco (Figure 4a), the  
330 curves of the recovered cases seem to increase contrary to the curves of infected after the  
331 lockdown lifting. Indeed, the country has allowed the reopening of cafes, restaurants and sports  
332 halls as well as the resumption of domestic tourism and interurban travel. On the other hand,  
333 the death curve tends to zero. This encouraging result may be explained by a better knowledge  
334 of the disease [30].

335 With just over 1.550 cases tested positive and around 51 deaths, Tunisia is the least affected  
336 country of the three Maghreb countries by the pandemic. According to Figure 3c and Figure 4c,  
337 there is a decrease in active cases after a peak in mid-April, followed by a second significant

338 peak predicted approximately in mid-October, due to the lockdown lifting. The curve of active  
339 cases (Figures 3c and 4c) describes well this reassuring trend, with a peak in mid-April and a  
340 drop which accelerated at the beginning of May to reach 0. This confirms the adequacy of the  
341 proposed SEIQRDP model. In addition, we notice a lower mortality rate compared to other  
342 countries as well as a significant recovery rate coupled with the low number of new cases  
343 which have eased the pressure on the hospital system. As for its Maghreb neighbors, Tunisia  
344 resorted to a treatment based on chloroquine [31]. However, according to the result of forecasts  
345 by the SEIQRDP model, the results are encouraging and confirms the end of the health crisis  
346 with a few scattered daily cases by the early August. However, for Egypt and South Africa  
347 (Figure 3d-f), the disease manifests itself in different ways compared to the Maghreb. Indeed,  
348 we note that the trend of the curves is almost the same from mid-March to July. Nevertheless,  
349 the two countries already stood out with a higher number of cases than the other countries  
350 during this same period.

351 was in the first place in terms of death until mid-July when the south of Africa is now the  
352 country most affected by the coronavirus in terms of death

353 Egypt currently has nearly 94.320 cases and around 4.830 deaths for a population of 100  
354 million inhabitants. Until mid-July, the Egypt recorded the highest number of deaths,  
355 afterwards, South Africa became the most affected country in terms of deaths, despite the  
356 rigorous preventive measures. The situation in Egypt may be explained by the poor health  
357 system [32] and the wave of patients COVID-19 which is growing day after day. However, the  
358 results of the SEIQRDP models correspond very well to the provided data. Regarding the  
359 forecasts of the pandemic in Egypt (Figure 3d), the results show that the number of infected  
360 cases continues to increase rapidly to reach the peak around the end of August. While, the  
361 number of recovered cases will increase less rapidly, whereas, the number of deaths cases  
362 remains high compared to the Maghreb and continue to increase. This stabilization in death  
363 cases may be explained by the recent use of the drug Remdesivir to treat the patients [33]. This  
364 treatment was authorized a few days ago in the United States and Japan, based on a positive  
365 American clinical trial[34].

366 South Africa tops the list of countries most affected by coronavirus (in terms of contamination).  
367 To date, there have been more than 503.290 cases of COVID-19 and around 8.153 deaths.  
368 From Figure 3e, we note that infected cases have experienced significant increase since the  
369 beginning of May and continues to increase. This is due to the lockdown lifting for certain  
370 industrial sectors, with a 1.5 million people who have been authorized to return to work, under  
371 strict health protection. Whereas, before these, the situation was under control because the very  
372 strict measures taken from the beginning made it possible to slow the progression of the  
373 pandemic of coronavirus. However, the curve of restored cases continues to grow and exceeds  
374 the infected cases since mid-May despite that the latter continues to increase. This can be  
375 explained by the community screening and testing (CST) operation in working-class  
376 neighborhoods. This massive campaign made it possible to isolate infected people as quickly as  
377 possible and trace their contacts. This massive campaign partially explains South Africa's  
378 success in the very slow development of the epidemic compared to other African countries for  
379 the same period (Figure 3a-e). Regarding the number of deaths, we note that it is stable so far,  
380 this stability is explained using the treatment protocol with chloroquine and the CST. In  
381 addition, the experience of the Ebola epidemic in South Africa which taught caregivers and

382 populations the best practices in place, such as, isolation of the sick, precautions during care  
383 and basic hygiene such as hand washing. For the forecast of the COVID-19 pandemic in South  
384 Africa by the SEIQRDP model (Figure 3e), the situation will stabilize in terms of infected and  
385 recovered cases, while the dead experienced a certain increase in mid-July, due to the lifting of  
386 the lockdown of certain economic [35].

387

#### 388 **4. Conclusion**

389 In this paper, mathematical model for the coronavirus COVID-19 epidemic development is  
390 performed for the most affected African countries based on an epidemiological SEIQRDP  
391 model, which is an adaptation of the classic SIR model widely used in mathematical  
392 epidemiology. The SEIQRDP model takes quarantine into account to match with the medical  
393 security measures adapted by many countries as an effective way of preventing the spread of  
394 the coronavirus COVID-19. Furthermore, considering all major parameters of the progression  
395 of the coronavirus, several analytic results established, while proving all the necessary  
396 properties for epidemiological relevance. This model allowed us to estimate the main epidemic  
397 parameters and forecast the evolution of the reproduction number of the disease over time in  
398 order to assess the epidemic situation and the effect of the applied preventive health measures.  
399 An acceptable agreement between the statistical data and the curves of the model was  
400 established. This indicates the suitability of the SEIQRDP in modelling the spread of the  
401 COVID-19 disease for the considered countries.

402 On the other hand, according to the statistical, fitted and predicted curves, we noticed that the  
403 epidemic peaks are between mid-April and mid-August, after which the epidemic declines.  
404 This situation can be explained by the policy adopted by African countries, aimed at effectively  
405 combating this virus. In addition, this confirms the effectiveness of the lockdown measures and  
406 curfews taken early enough to slow the spread of the disease. Most countries have implemented  
407 these measures as soon as the first case is detected. In France, it took 52 days after the first case  
408 to take such measures. In addition to this factor, there are many other factors that contribute to  
409 the robust and rapid response of these countries. The other main explanation is the youth of the  
410 African population, around 60% of the population under 25 years of age. In addition, the  
411 population density is lower in Africa, thus limiting the spread of the virus, as is the low  
412 mobility of African populations in comparison with Western populations, where most of the  
413 cases remain concentrated in the capitals and large cities.

414 However, caution should probably follow. A general lockdown lifting seems unlikely, while  
415 the gradual lifting of lockdown experienced by the countries under study by city, depending on  
416 the mortality rate and the number of new infections observed, may be reasonable in compliance  
417 with the measures of security. However, Algeria and Tunisia may experience new peaks  
418 expected mid-October, due to the lifting of lockdown, where countries have allowed the  
419 reopening of cafes, restaurants and gymnasiums as well as the resumption of tourism domestic  
420 and interurban. Nevertheless, the three Maghreb countries will have to strengthen the control of  
421 health measures, to avoid the epidemic resumption. The crucial element will remain the  
422 generalization of tests which will remain one of the main ingredients in the fight against  
423 epidemics in the country. All these precautions will effectively reduce the number of basic

424 reproductions at each interaction, which is considered a crucial parameter during a pandemic  
425 used to estimate the risk of an outbreak of COVID-19 and assess the effectiveness of the  
426 measures implemented.

427 Finally, the epidemiological situation is reassuring in the three Maghreb countries, while for  
428 South Africa, the situation seems controllable, mainly due to the CST operation. However, in  
429 Egypt the number of infected cases continues to increase, the situation comes mainly from  
430 ignorance of physical distancing measures and the violation of curfews after the last relaxation  
431 of the restrictions in mid-March. In fact, without control of the population and lack of effective  
432 treatment and vaccine, there will be no way to prevent the death of many people. Furthermore,  
433 hospitals will be flooded and will never be able to manage the pandemic.

## 434 5. References

- 435
- 436 1. Roosa, K., et al., *Short-term forecasts of the COVID-19 epidemic in Guangdong and Zhejiang,*  
437 *China: February 13–23, 2020.* Journal of clinical medicine, 2020. **9**(2): p. 596.
  - 438 2. Peng, L., et al., *Epidemic analysis of COVID-19 in China by dynamical modeling.* arXiv preprint  
439 arXiv:2002.06563, 2020.
  - 440 3. Kucharski, A.J., et al., *Early dynamics of transmission and control of COVID-19: a mathematical*  
441 *modelling study.* The lancet infectious diseases, 2020.
  - 442 4. Yang, Z., et al., *Modified SEIR and AI prediction of the epidemics trend of COVID-19 in China*  
443 *under public health interventions.* Journal of Thoracic Disease, 2020. **12**(3): p. 165.
  - 444 5. Khrapov, P. and A. Loginova, *Mathematical modelling of the dynamics of the Coronavirus*  
445 *COVID-19 epidemic development in China.* International Journal of Open Information  
446 Technologies, 2020. **8**(4): p. 13-16.
  - 447 6. Anastassopoulou, C., et al., *Data-based analysis, modelling and forecasting of the COVID-19*  
448 *outbreak.* PloS one, 2020. **15**(3): p. e0230405.
  - 449 7. Tan, S.X. and L. Chen, *Real-Time Differential Epidemic Analysis and Prediction for COVID-19*  
450 *Pandemic.* arXiv preprint arXiv:2004.06888, 2020.
  - 451 8. Godio, A., F. Pace, and A. Vergnano, *SEIR Modeling of the Italian Epidemic of SARS-CoV-2.*  
452 2020.
  - 453 9. Piccolomini, E.L. and F. Zama, *Preliminary analysis of COVID-19 spread in Italy with an adaptive*  
454 *SEIRD model.* arXiv preprint arXiv:2003.09909, 2020.
  - 455 10. Fanelli, D. and F. Piazza, *Analysis and forecast of COVID-19 spreading in China, Italy and*  
456 *France.* Chaos, Solitons & Fractals, 2020. **134**: p. 109761.
  - 457 11. Bastos, S.B. and D.O. Cajueiro, *Modeling and forecasting the early evolution of the Covid-19*  
458 *pandemic in Brazil.* arXiv preprint arXiv:2003.14288, 2020.
  - 459 12. Peirlinck, M., et al., *Outbreak dynamics of COVID-19 in China and the United States.*  
460 *Biomechanics and modeling in mechanobiology,* 2020: p. 1.
  - 461 13. Dandekar, R. and G. Barbastathis, *Neural Network aided quarantine control model estimation*  
462 *of global Covid-19 spread.* arXiv preprint arXiv:2004.02752, 2020.
  - 463 14. Zhao, Z., et al., *Prediction of the COVID-19 spread in African countries and implications for*  
464 *prevention and controls: A case study in South Africa, Egypt, Algeria, Nigeria, Senegal and*  
465 *Kenya.* Science of the Total Environment, 2020: p. 138959.
  - 466 15. Baldé, M.A.M.T., *Fitting SIR model to COVID-19 pandemic data and comparative forecasting*  
467 *with machine learning.* medRxiv, 2020.
  - 468 16. Rouabah, M.T., A. Tounsi, and N.-E. Belaloui, *Early dynamics of COVID-19 in Algeria: a model-*  
469 *based study.* arXiv preprint arXiv:2005.13516, 2020.
  - 470 17. *Engineering, J.H.U.C.f.S.S.a. 2019 Novel Coronavirus*  
471 *COVID-19 (2019-nCoV) Data Repository by Johns Hopkins CSSE.*

- 472 18. Anderson, R.M. and R.M. May, *Infectious diseases of humans: dynamics and control* 1992:  
473 Oxford university press.
- 474 19. Hethcote, H.W. and P. Van den Driessche, *Some epidemiological models with nonlinear*  
475 *incidence*. Journal of Mathematical Biology, 1991. **29**(3): p. 271-287.
- 476 20. Olivier, L. and I. Craig, *An epidemiological model for the spread of COVID-19: A South African*  
477 *case study*. arXiv preprint arXiv:2005.08012, 2020.
- 478 21. Caccavo, D., *Chinese and Italian COVID-19 outbreaks can be correctly described by a modified*  
479 *SIRD model*. medRxiv, 2020.
- 480 22. Diekmann, O., J. Heesterbeek, and M.G. Roberts, *The construction of next-generation matrices*  
481 *for compartmental epidemic models*. Journal of the Royal Society Interface, 2010. **7**(47): p.  
482 873-885.
- 483 23. Cheynet, E., *Generalized SEIR Epidemic Model (fitting and computation)*, 2020, GitHub.
- 484 24. Guan, W.-j., et al., *Clinical characteristics of 2019 novel coronavirus infection in China*.  
485 medRxiv, 2020.
- 486 25. de León, U.A.-P., A.G. Pérez, and E. Avila-Vales, *A data driven analysis and forecast of an*  
487 *SEIARD epidemic model for COVID-19 in Mexico*. arXiv preprint arXiv:2004.08288, 2020.
- 488 26. Nadim, S.S., I. Ghosh, and J. Chattopadhyay, *Short-term predictions and prevention strategies*  
489 *for COVID-2019: A model based study*. arXiv preprint arXiv:2003.08150, 2020.
- 490 27. Li, R., et al., *Substantial undocumented infection facilitates the rapid dissemination of novel*  
491 *coronavirus (SARS-CoV-2)*. Science, 2020. **368**(6490): p. 489-493.
- 492 28. Lai, C.-C., et al., *Severe acute respiratory syndrome coronavirus 2 (SARS-CoV-2) and corona*  
493 *virus disease-2019 (COVID-19): the epidemic and the challenges*. International journal of  
494 antimicrobial agents, 2020: p. 105924.
- 495 29. Boutebal, S.E. and A. Madani, *Gravity Index of the (COVID-19) pandemic in the first*  
496 *deconfinement phase in Algeria*. Available at SSRN 3598663, 2020.
- 497 30. Yitong, W., et al., *Rapid systematic review on clinical evidence of chloroquine and*  
498 *hydroxychloroquine in COVID-19: critical assessment and recommendation for future clinical*  
499 *trials*. MedRxiv, 2020.
- 500 31. Toumi, M. and S. Aballea, *Commentary on "Hydroxychloroquine and azithromycin as a*  
501 *treatment of COVID-19: results of an open label non-randomized clinical trial" by Gautret et al.*  
502 *Journal of Market Access & Health Policy*, 2020. **8**(1): p. 1758390.
- 503 32. Kamel, M.I., *A view of the health services after COVID-19: an Egyptian perspective*. Alexandria  
504 Journal of Medicine, 2020. **56**(1): p. 118-129.
- 505 33. Saqrane, S. and M.A. El Mhammedi, *Review on the global epidemiological situation and the*  
506 *efficacy of chloroquine and hydroxychloroquine for the treatment of COVID-19*. New Microbes  
507 and New Infections, 2020. **35**: p. 100680.
- 508 34. Jorgensen, S.C.J., R. Kebriaei, and L.D. Dresser, *Remdesivir: Review of Pharmacology, Pre-*  
509 *clinical Data, and Emerging Clinical Experience for COVID-19*. Pharmacotherapy: The Journal of  
510 Human Pharmacology and Drug Therapy, 2020. **40**(7): p. 659-671.
- 511 35. Schröder, M., et al., *COVID-19 in Africa--outbreak despite interventions?* arXiv preprint  
512 arXiv:2004.12319, 2020.

513

514
